# Supplementary material for: Activity strategy and pattern of the Siberian jerboa (Orientallactaga sibirica) in the Alxa desert region, China
Source: PeerJ. 2021 Mar 10;9:e10996. doi: 10.7717/peerj.10996 (PMC7955674; doi:10.7717/peerj.10996)
Supplement: Supplemental Information 1 — Each worksheet represents one type of data. [file peerj-09-10996-s001.xlsx]

## Sheet: Activity time and frequency
Month	Time	Sample	Activity time（s）	Activity frequency	Predation risk
May	00:00-01:00	sample1	57	7	0.235294
May	00:00-01:00	sample2	194	13	0.175
May	00:00-01:00	sample3	125.5	10	0.12069
May	00:00-01:00	sample4	75	10	0.106667
May	00:00-01:00	sample5	84	6	0.0691824
May	00:00-01:00	sample6	79.5	8	0.0640569
May	00:00-01:00	sample7	40	12	0.0530303
May	00:00-01:00	sample8	18	1	0.0360825
May	00:00-01:00	sample9	29	6.5	0.0357143
May	00:00-01:00	sample10	17	3	0.0318725
May	00:00-01:00	sample11	264	24	0.0175439
May	00:00-01:00	sample12	140.5	13.5	0
May	01:00-02:00	sample14	191	23	0.257143
May	01:00-02:00	sample15	40	3	0.229885
May	01:00-02:00	sample16	115.5	13	0.229885
May	01:00-02:00	sample17	60	5	0.190476
May	01:00-02:00	sample18	35	6	0.171429
May	01:00-02:00	sample19	47.5	5.5	0.115789
May	01:00-02:00	sample20	87	32	0.0571429
May	01:00-02:00	sample21	0	0	0.0471204
May	01:00-02:00	sample22	43.5	16	0.038961
May	01:00-02:00	sample23	35	6	0.0333333
May	01:00-02:00	sample24	210	29	0
May	01:00-02:00	sample25	122.5	17.5	0
May	02:00-03:00	sample27	157	23	0.216216
May	02:00-03:00	sample28	0	0	0.216216
May	02:00-03:00	sample29	78.5	11.5	0.107895
May	02:00-03:00	sample30	105	9	0.10733
May	02:00-03:00	sample31	159	18	0.0318471
May	02:00-03:00	sample32	132	13.5	0.0318471
May	02:00-03:00	sample33	37	9	0.0314465
May	02:00-03:00	sample34	0	0	0.030303
May	02:00-03:00	sample35	18.5	4.5	0.0285714
May	02:00-03:00	sample36	2	1	0.0890747
May	02:00-03:00	sample37	380	58	0.0890747
May	02:00-03:00	sample38	191	29.5	0.0890747
May	03:00-04:00	sample40	480	38	0.182879
May	03:00-04:00	sample41	0	0	0.182171
May	03:00-04:00	sample42	240	19	0.0737705
May	03:00-04:00	sample43	42	5	0.0670732
May	03:00-04:00	sample44	122	11	0.047619
May	03:00-04:00	sample45	82	8	0.0229167
May	03:00-04:00	sample46	62	6	0.0229167
May	03:00-04:00	sample47	0	0	0.016129
May	03:00-04:00	sample48	31	3	0.016129
May	03:00-04:00	sample49	1	1	0.0701782
May	03:00-04:00	sample50	257	48	0.0701782
May	03:00-04:00	sample51	129	24.5	0.0701782
May	04:00-05:00	sample53	107	7	0.244444
May	04:00-05:00	sample54	0	0	0.244444
May	04:00-05:00	sample55	53.5	3.5	0.100629
May	04:00-05:00	sample56	55	4	0.100629
May	04:00-05:00	sample57	34	4	0.172537
May	04:00-05:00	sample58	44.5	4	0.172537
May	04:00-05:00	sample59	45	13	0.172537
May	04:00-05:00	sample60	0	0	0.172537
May	04:00-05:00	sample61	22.5	6.5	0.172537
May	04:00-05:00	sample62	0	0	0.172537
May	04:00-05:00	sample63	318	43	0.172537
May	04:00-05:00	sample64	159	21.5	0.172537
May	05:00-06:00	sample66	0	0	0.333333
May	05:00-06:00	sample67	0	0	0.333333
May	05:00-06:00	sample68	0	0	0.324324
May	05:00-06:00	sample69	0	0	0.324324
May	05:00-06:00	sample70	1	1	0.328829
May	05:00-06:00	sample71	0.5	0.5	0.328829
May	05:00-06:00	sample72	39	5	0.328829
May	05:00-06:00	sample73	0	0	0.328829
May	05:00-06:00	sample74	19.5	2.5	0.328829
May	05:00-06:00	sample75	0	0	0.328829
May	05:00-06:00	sample76	37	14	0.328829
May	05:00-06:00	sample77	18.5	7	0.328829
May	06:00-07:00	sample79	0	0	0
May	06:00-07:00	sample80	0	0	0
May	06:00-07:00	sample81	0	0	0
May	06:00-07:00	sample82	0	0	0
May	06:00-07:00	sample83	0	0	0
May	06:00-07:00	sample84	0	0	0
May	06:00-07:00	sample85	0	0	0
May	06:00-07:00	sample86	0	0	0
May	06:00-07:00	sample87	0	0	0
May	06:00-07:00	sample88	0	0	0
May	06:00-07:00	sample89	0	0	0
May	06:00-07:00	sample90	0	0	0
May	19:00-20:00	sample92	0	0	0
May	19:00-20:00	sample93	0	0	0
May	19:00-20:00	sample94	0	0	0
May	19:00-20:00	sample95	0	0	0
May	19:00-20:00	sample96	0	0	0
May	19:00-20:00	sample97	0	0	0
May	19:00-20:00	sample98	0	0	0
May	19:00-20:00	sample99	0	0	0
May	19:00-20:00	sample100	0	0	0
May	19:00-20:00	sample101	0	0	0
May	19:00-20:00	sample102	0	0	0
May	19:00-20:00	sample103	0	0	0
May	20:00-21:00	sample105	0	0	0
May	20:00-21:00	sample106	12	3	0
May	20:00-21:00	sample107	6	1.5	0
May	20:00-21:00	sample108	0	0	0
May	20:00-21:00	sample109	0	0	0
May	20:00-21:00	sample110	0	0	0
May	20:00-21:00	sample111	28	4	0
May	20:00-21:00	sample112	162	12	0
May	20:00-21:00	sample113	95	8	0
May	20:00-21:00	sample114	0	0	0
May	20:00-21:00	sample115	315	20	0.0380952
May	20:00-21:00	sample116	157.5	10	0.0380952
May	21:00-22:00	sample118	140	10	0.0285714
May	21:00-22:00	sample119	163	13	0.0613497
May	21:00-22:00	sample120	151.5	11.5	0.0462046
May	21:00-22:00	sample121	55	5	0
May	21:00-22:00	sample122	0	0	0
May	21:00-22:00	sample123	27.5	2.5	0
May	21:00-22:00	sample124	88	1	0
May	21:00-22:00	sample125	213	16	0.122066
May	21:00-22:00	sample126	150.5	8.5	0.0863787
May	21:00-22:00	sample127	11	5	0
May	21:00-22:00	sample128	701	29	0.0485021
May	21:00-22:00	sample129	356	17	0.0477528
May	22:00-23:00	sample131	4	2	0
May	22:00-23:00	sample132	298	17	0.107383
May	22:00-23:00	sample133	151	9.5	0.10596
May	22:00-23:00	sample134	300	23	0.14
May	22:00-23:00	sample135	0	0	0
May	22:00-23:00	sample136	150	11.5	0.14
May	22:00-23:00	sample137	428	20	0.088785
May	22:00-23:00	sample138	182	29	0.0659341
May	22:00-23:00	sample139	305	24.5	0.0819672
May	22:00-23:00	sample140	33	4	0.0606061
May	22:00-23:00	sample141	330	7	0.00909091
May	22:00-23:00	sample142	181.5	5.5	0.0137741
May	23:00-00:00	sample143	69	7	0.057971
May	23:00-00:00	sample144	240	9	0.00833333
May	23:00-00:00	sample145	154.5	8	0.0194175
May	23:00-00:00	sample146	137	15	0.175182
May	23:00-00:00	sample147	145	6	0.172414
May	23:00-00:00	sample148	141	10.5	0.173759
May	23:00-00:00	sample149	77	9	0.025974
May	23:00-00:00	sample150	167	17	0.0419162
May	23:00-00:00	sample151	122	13	0.0368852
May	23:00-00:00	sample152	0	0	0
May	23:00-00:00	sample153	436	15	0.0550459
May	23:00-00:00	sample154	218	7.5	0.0550459
July	00:00-01:00	sample1	0	0	0.0860846
July	00:00-01:00	sample2	2	1	0.5
July	00:00-01:00	sample3	24	1.5	0.0833333
July	00:00-01:00	sample4	46.5	3	0.0519481
July	00:00-01:00	sample5	66.5	3	0.0461538
July	00:00-01:00	sample6	77	3.5	0.0430108
July	00:00-01:00	sample7	91	6	0.032967
July	00:00-01:00	sample8	130	8	0.0319149
July	00:00-01:00	sample9	133	9	0.0188679
July	00:00-01:00	sample10	188	10	0.0150376
July	00:00-01:00	sample11	212	10	0.0150376
July	00:00-01:00	sample12	236	17	0.00847458
July	01:00-02:00	sample14	0	0	0
July	01:00-02:00	sample15	6	1.5	0.166667
July	01:00-02:00	sample16	22.5	3	0.0888889
July	01:00-02:00	sample17	26	3	0.0769231
July	01:00-02:00	sample18	35.5	4	0.0769231
July	01:00-02:00	sample19	39	4	0.0482759
July	01:00-02:00	sample20	39	4.5	0.0384615
July	01:00-02:00	sample21	52	5	0.0344828
July	01:00-02:00	sample22	71	5	0.028169
July	01:00-02:00	sample23	145	8	0.028169
July	01:00-02:00	sample24	145	9.5	0.0206897
July	01:00-02:00	sample25	145	11	0.0192308
July	02:00-03:00	sample27	0	0	0
July	02:00-03:00	sample28	19	1	0.0588235
July	02:00-03:00	sample29	24	1	0.0526316
July	02:00-03:00	sample30	29	1	0.0434783
July	02:00-03:00	sample31	34	1	0.0416667
July	02:00-03:00	sample32	49.5	2	0.0413223
July	02:00-03:00	sample33	56	3	0.0357143
July	02:00-03:00	sample34	99	4	0.0344828
July	02:00-03:00	sample35	138	14.5	0.0142857
July	02:00-03:00	sample36	210	15.5	0.010989
July	02:00-03:00	sample37	242	25	0.010101
July	02:00-03:00	sample38	364	28	0.010101
July	03:00-04:00	sample40	0	0	0
July	03:00-04:00	sample41	0	0	0.0649351
July	03:00-04:00	sample42	0	0	0.0649351
July	03:00-04:00	sample43	0	0	0.064
July	03:00-04:00	sample44	16	3	0.064
July	03:00-04:00	sample45	32	6	0.0625
July	03:00-04:00	sample46	38.5	7.5	0.0625
July	03:00-04:00	sample47	77	12.5	0.0327869
July	03:00-04:00	sample48	125	14.5	0.0327869
July	03:00-04:00	sample49	152.5	15	0
July	03:00-04:00	sample50	250	25	0
July	03:00-04:00	sample51	305	29	0
July	04:00-05:00	sample53	0	0	0
July	04:00-05:00	sample54	0	0	0.0892857
July	04:00-05:00	sample55	0	0	0.0892857
July	04:00-05:00	sample56	0	0	0.0819672
July	04:00-05:00	sample57	28	3.5	0.0819672
July	04:00-05:00	sample58	54	7	0.037037
July	04:00-05:00	sample59	56	8	0.037037
July	04:00-05:00	sample60	61	9	0.0304183
July	04:00-05:00	sample61	108	16	0.0304183
July	04:00-05:00	sample62	122	16.5	0
July	04:00-05:00	sample63	131.5	18	0
July	04:00-05:00	sample64	263	33	0
July	05:00-06:00	sample66	0	0	0
July	05:00-06:00	sample67	0	0	0
July	05:00-06:00	sample68	0	0	0
July	05:00-06:00	sample69	0	0	0
July	05:00-06:00	sample70	0	0	0
July	05:00-06:00	sample71	0	0	0
July	05:00-06:00	sample72	0	0	0
July	05:00-06:00	sample73	0	0	0
July	05:00-06:00	sample74	0	0	0
July	05:00-06:00	sample75	0	0	0
July	05:00-06:00	sample76	0	0	0
July	05:00-06:00	sample77	0	0	0
July	06:00-07:00	sample79	0	0	0
July	06:00-07:00	sample80	0	0	0
July	06:00-07:00	sample81	0	0	0
July	06:00-07:00	sample82	0	0	0
July	06:00-07:00	sample83	0	0	0
July	06:00-07:00	sample84	0	0	0
July	06:00-07:00	sample85	0	0	0
July	06:00-07:00	sample86	0	0	0
July	06:00-07:00	sample87	0	0	0
July	06:00-07:00	sample88	0	0	0
July	06:00-07:00	sample89	0	0	0
July	06:00-07:00	sample90	0	0	0
July	19:00-20:00	sample92	0	0	0
July	19:00-20:00	sample93	0	0	0
July	19:00-20:00	sample94	0	0	0
July	19:00-20:00	sample95	0	0	0
July	19:00-20:00	sample96	0	0	0
July	19:00-20:00	sample97	0	0	0
July	19:00-20:00	sample98	0	0	0
July	19:00-20:00	sample99	0	0	0
July	19:00-20:00	sample100	0	0	0
July	19:00-20:00	sample101	0	0	0
July	19:00-20:00	sample102	0	0	0
July	19:00-20:00	sample103	0	0	0
July	20:00-21:00	sample105	0	0	0
July	20:00-21:00	sample106	0	0	0
July	20:00-21:00	sample107	0	0	0
July	20:00-21:00	sample108	0	0	0
July	20:00-21:00	sample109	0	0	0
July	20:00-21:00	sample110	0	0	0
July	20:00-21:00	sample111	31	0	0
July	20:00-21:00	sample112	15.5	0	0.0645161
July	20:00-21:00	sample113	0	0	0.0645161
July	20:00-21:00	sample114	0	0	0
July	20:00-21:00	sample115	0	2.5	0
July	20:00-21:00	sample116	0	5	0
July	21:00-22:00	sample118	0	0	0
July	21:00-22:00	sample119	0	0	0.2
July	21:00-22:00	sample120	0	0	0.0697674
July	21:00-22:00	sample121	0	0	0.0697674
July	21:00-22:00	sample122	5	1	0.0257511
July	21:00-22:00	sample123	86	6	0.0219298
July	21:00-22:00	sample124	116.5	7	0.0173077
July	21:00-22:00	sample125	172	8	0.0166799
July	21:00-22:00	sample126	219	11	0.0136986
July	21:00-22:00	sample127	228	14	0
July	21:00-22:00	sample128	629.5	28.5	0
July	21:00-22:00	sample129	1040	49	0
July	22:00-23:00	sample131	0	0	0
July	22:00-23:00	sample132	0	0	0.0533333
July	22:00-23:00	sample133	0	0	0.0497238
July	22:00-23:00	sample134	84	3	0.0486322
July	22:00-23:00	sample135	112	6	0.0472973
July	22:00-23:00	sample136	131	7.5	0.0357143
July	22:00-23:00	sample137	148	8.5	0.0343511
July	22:00-23:00	sample138	150	9	0.0152905
July	22:00-23:00	sample139	164.5	13	0.0133779
July	22:00-23:00	sample140	181	14	0.00892857
July	22:00-23:00	sample141	490.5	17.5	0
July	22:00-23:00	sample142	897	22	0
July	23:00-00:00	sample143	0	0	0
July	23:00-00:00	sample144	16	1	0.130435
July	23:00-00:00	sample145	23	2	0.102941
July	23:00-00:00	sample146	34	2	0.0888889
July	23:00-00:00	sample147	45	4	0.0704225
July	23:00-00:00	sample148	59.5	5	0.0625
July	23:00-00:00	sample149	71	5	0.0336538
July	23:00-00:00	sample150	104	6	0.03125
July	23:00-00:00	sample151	119	7	0.0181818
July	23:00-00:00	sample152	192	7.5	0.011236
July	23:00-00:00	sample153	302.5	8	0.00840336
July	23:00-00:00	sample154	534	8	0.00840336
September	00:00-01:00	sample1	0	2	0
September	00:00-01:00	sample2	0	2	0
September	00:00-01:00	sample3	0	2	0
September	00:00-01:00	sample4	0	7	0
September	00:00-01:00	sample5	0	2	0
September	00:00-01:00	sample6	0	0	0
September	00:00-01:00	sample7	12	0	0
September	00:00-01:00	sample8	19	0	0.0719424
September	00:00-01:00	sample9	25	8	0.0526316
September	00:00-01:00	sample10	38	0	0.0447761
September	00:00-01:00	sample11	67	0	0
September	00:00-01:00	sample12	139	0	0
September	01:00-02:00	sample15	0	1	0
September	01:00-02:00	sample16	0	1	0
September	01:00-02:00	sample17	5	1	0
September	01:00-02:00	sample18	11	0	0
September	01:00-02:00	sample19	17	5	0
September	01:00-02:00	sample20	19	2	0
September	01:00-02:00	sample21	24	5	0
September	01:00-02:00	sample22	43.5	0	0.352941
September	01:00-02:00	sample23	58	2	0.275862
September	01:00-02:00	sample24	68	5	0.0649351
September	01:00-02:00	sample25	77	3	0.0416667
September	01:00-02:00	sample27	85	1	0.0344828
September	02:00-03:00	sample29	0	2	0
September	02:00-03:00	sample30	0	1	0
September	02:00-03:00	sample31	2	0	0
September	02:00-03:00	sample32	12	0	0
September	02:00-03:00	sample33	19	2	1
September	02:00-03:00	sample34	24	1	0.115152
September	02:00-03:00	sample35	29	2	0.047619
September	02:00-03:00	sample36	37	5	0.0365854
September	02:00-03:00	sample37	41	5	0.0344828
September	02:00-03:00	sample38	63	2	0
September	02:00-03:00	sample40	125	1.5	0
September	02:00-03:00	sample41	165	1	0
September	03:00-04:00	sample43	0	0	0
September	03:00-04:00	sample44	0	2	0.0625
September	03:00-04:00	sample45	1	4	0.0434783
September	03:00-04:00	sample46	4	1	0.0434783
September	03:00-04:00	sample47	11.5	2	0.029703
September	03:00-04:00	sample48	12	0	0.028777
September	03:00-04:00	sample49	16	2	0.0285714
September	03:00-04:00	sample50	23	1	0.0243902
September	03:00-04:00	sample51	35	1	0
September	03:00-04:00	sample53	69.5	6	0
September	03:00-04:00	sample54	101	4	0
September	03:00-04:00	sample55	123	2	0
September	04:00-05:00	sample57	0	0	0
September	04:00-05:00	sample58	0	0.5	1
September	04:00-05:00	sample59	0	1	1
September	04:00-05:00	sample60	0.5	4	0.1
September	04:00-05:00	sample61	1	10	0.0740741
September	04:00-05:00	sample62	27	0	0.0703125
September	04:00-05:00	sample63	72	5	0.0555556
September	04:00-05:00	sample64	72.5	0	0.0482759
September	04:00-05:00	sample66	73	9	0.0410959
September	04:00-05:00	sample67	100	6	0.028
September	04:00-05:00	sample68	250	7	0
September	04:00-05:00	sample69	256	8	0
September	05:00-06:00	sample71	0	0	0
September	05:00-06:00	sample72	0	0	0
September	05:00-06:00	sample73	0	0	0
September	05:00-06:00	sample74	0	0	0
September	05:00-06:00	sample75	0	0	0
September	05:00-06:00	sample76	0	0	0
September	05:00-06:00	sample77	0	1	0
September	05:00-06:00	sample79	0	0	0
September	05:00-06:00	sample80	14	4	0.0318471
September	05:00-06:00	sample81	33.5	0	0
September	05:00-06:00	sample82	67	4	0.0447761
September	05:00-06:00	sample83	157	8	0.0447761
September	06:00-07:00	sample85	0	0	0
September	06:00-07:00	sample86	0	0	0
September	06:00-07:00	sample87	0	0	0
September	06:00-07:00	sample88	0	0	0
September	06:00-07:00	sample89	0	0	0
September	06:00-07:00	sample90	0	0	0
September	06:00-07:00	sample92	0	0	0
September	06:00-07:00	sample93	0	0	0
September	06:00-07:00	sample94	0	0	0
September	06:00-07:00	sample95	0	0	0
September	06:00-07:00	sample96	0	0	0
September	06:00-07:00	sample97	0	0	0
September	19:00-20:00	sample99	0	0	0
September	19:00-20:00	sample100	0	0	0
September	19:00-20:00	sample101	0	0	0
September	19:00-20:00	sample102	0	3	0.105263
September	19:00-20:00	sample103	0	0	0
September	19:00-20:00	sample105	0	0	0
September	19:00-20:00	sample106	0	0	0
September	19:00-20:00	sample107	0	0	0
September	19:00-20:00	sample108	0	0	0
September	19:00-20:00	sample109	19	2	0.0133333
September	19:00-20:00	sample110	37.5	1	0.0133333
September	19:00-20:00	sample111	75	0	0
September	20:00-21:00	sample113	0	1	0
September	20:00-21:00	sample114	0	0.5	0
September	20:00-21:00	sample115	9.5	0	0
September	20:00-21:00	sample116	11	5	0
September	20:00-21:00	sample118	19	0	0
September	20:00-21:00	sample119	68	5	0.0206897
September	20:00-21:00	sample120	82	3	0.0168067
September	20:00-21:00	sample121	99	5	0.109756
September	20:00-21:00	sample122	102.5	1	0
September	20:00-21:00	sample123	106	4	0.0471698
September	20:00-21:00	sample124	119	4.5	0.131707
September	20:00-21:00	sample125	145	5	0.222222
September	21:00-22:00	sample127	0	1	0
September	21:00-22:00	sample128	0	0.5	0
September	21:00-22:00	sample129	0	0	0
September	21:00-22:00	sample131	0	1	0
September	21:00-22:00	sample132	0	0	0
September	21:00-22:00	sample133	0	0	0
September	21:00-22:00	sample134	9.5	0	0
September	21:00-22:00	sample135	12	0	0
September	21:00-22:00	sample136	19	0	0
September	21:00-22:00	sample137	19	2	0
September	21:00-22:00	sample138	67	2.5	0.00746269
September	21:00-22:00	sample139	122	3	0.0833333
September	22:00-23:00	sample141	0	1	0
September	22:00-23:00	sample142	0	0.5	0
September	22:00-23:00	sample143	0	0	0
September	22:00-23:00	sample144	0	0	0
September	22:00-23:00	sample145	1	1	0
September	22:00-23:00	sample146	9.5	0	0
September	22:00-23:00	sample147	10	0	0
September	22:00-23:00	sample148	19	1	0
September	22:00-23:00	sample149	21	1	0
September	22:00-23:00	sample150	30	5	0.0291971
September	22:00-23:00	sample151	79	4	0.0379747
September	22:00-23:00	sample152	137	3	0.0952381
September	23:00-00:00	sample154	0	0	0
September	23:00-00:00	sample155	0	3	0.129032
September	23:00-00:00	sample156	0	6	0.129032
September	23:00-00:00	sample157	9	0	0
September	23:00-00:00	sample158	12	0	0
September	23:00-00:00	sample159	15.5	7	0.0429448
September	23:00-00:00	sample160	31	5	0.0888889
September	23:00-00:00	sample161	45	10	0.00862069
September	23:00-00:00	sample162	70	2	0
September	23:00-00:00	sample163	116	4	0.0229008
September	23:00-00:00	sample164	131	4	0.0285714
September	23:00-00:00	sample165	163	4	0.111111

## Sheet: Preference food biomass  
Month	Sample	Total food biomass (g/m2)	Preference food biomass (g/m2)
May	1	26.31	12.18
May	2	62.8	13.71
May	3	109.42	62.03
May	4	59.97	42.29
May	5	141.272	31.37
May	6	28.95	17.12
May	7	31.7863	21.75
May	8	26.8471	12.2
May	9	29.42	22.15
July	1	508.75	40.93
July	2	508.75	35.11
July	3	423.78	22.36
July	4	674.48	45.72
July	5	487.36	40.69
July	6	456.37	21.02
July	7	480.32	10.57
July	8	450.23	26.39
July	9	415.2	32.1
September	1	397.41	277.81
September	2	574.63	175.42
September	3	316.24	54.07
September	4	638.58	507.39
September	5	450.79	315.59
September	6	320.25	174.59
September	7	281.56	240.51
September	8	349.29	178.98
September	9	137.73	37.44

## Sheet: Cilmate factores
		Temperature ℃	Relative humidity(%)	Weed Speed(m/s)
May	19:00-20:00	21.5	18	5.1
May	20:00-21:00	17.9	29	3.1
May	21:00-22:00	16.6	33	2.5
May	22:00-23:00	14.8	37	2.4
May	23:00-00:00	14	38	2.5
May	00:00-01:00	23	6	3.2
May	01:00-02:00	16.7	12	3.9
May	02:00-03:00	15.3	14	3.4
May	03:00-04:00	11.5	43	3.4
May	04:00-05:00	14.6	16	0.9
May	05:00-06:00	11.9	21	1
May	06:00-07:00	11.5	21	0.7
July	19:00-20:00	26	51	3.8
July	20:00-21:00	25.5	55	3.3
July	21:00-22:00	24.6	58	2.4
July	22:00-23:00	23.7	61	2.1
July	23:00-00:00	23	64	2.5
July	00:00-01:00	34.6	33	4.3
July	01:00-02:00	33.4	37	6.2
July	02:00-03:00	32.4	40	3.9
July	03:00-04:00	31.8	42	3.8
July	04:00-05:00	29.1	45	3.2
July	05:00-06:00	27.6	41	2.5
July	06:00-07:00	26.1	58	7.3
September	19:00-20:00	15.2	71	2.2
September	20:00-21:00	17.8	69	2.5
September	21:00-22:00	13	72	1.1
September	22:00-23:00	13.1	75	1.4
September	23:00-00:00	12.8	79	0
September	00:00-01:00	20.8	45	3
September	01:00-02:00	18.6	49	1.7
September	02:00-03:00	17.3	51	1.6
September	03:00-04:00	18.8	60	0.8
September	04:00-05:00	16.5	60	2.2
September	05:00-06:00	16	68	1.3
September	06:00-07:00	14.7	68	1.6

## Sheet: Community composition of rodent
Month	Species	Relative population number (%)
May	Dipus sagitta	1.33929
May	Phodopus roborovskii	2.94643
May	Meriones meridianus	0.446429
May	Allactaga sibirica	5.50595
May	Dipus sagitta	2.55952
May	Phodopus roborovskii	2.00893
May	Meriones meridianus	5.90774
May	Allactaga sibirica	5.44643
May	Dipus sagitta	0.669643
May	Phodopus roborovskii	0
May	Meriones meridianus	3.22917
May	Allactaga sibirica	6.41667
July	Dipus sagitta	1.33929
July	Phodopus roborovskii	0
July	Meriones meridianus	0.446429
July	Allactaga sibirica	3.57143
July	Dipus sagitta	5.97895e-05
July	Phodopus roborovskii	0
July	Meriones meridianus	3.57143
July	Allactaga sibirica	5.80357
July	Dipus sagitta	0.669673
July	Phodopus roborovskii	0
July	Meriones meridianus	2.00893
July	Allactaga sibirica	1.5625
September	Dipus sagitta	0.892857
September	Phodopus roborovskii	0
September	Meriones meridianus	1.33929
September	Allactaga sibirica	1.79
September	Dipus sagitta	0
September	Phodopus roborovskii	0
September	Meriones meridianus	3.13
September	Allactaga sibirica	1.78
September	Dipus sagitta	0.892857
September	Phodopus roborovskii	0
September	Meriones meridianus	1.33929
September	Allactaga sibirica	0.89
